# Supplementary material for: Sequence Length of HIV-1 Subtype B Increases Over Time: Analysis of a Cohort of Patients With Hemophilia Over 30 Years
Source: Preprints.org preprint supplement (doi:10.20944/preprints202104.0217.v1), 2021-04-07
Supplement: Supplementary file 6 [file Table S2.docx]

**Table S2.** Signature pattern residues in the Pol proteins of 96 Korean subclade of HIV-1 subtype B.

| **31 Korean signature nucleotides and 11 Korean signature amino acids residues** | | | | | | | | | | | | | | | | | | | | | | | | | | |
| --- | --- | --- | --- | --- | --- | --- | --- | --- | --- | --- | --- | --- | --- | --- | --- | --- | --- | --- | --- | --- | --- | --- | --- | --- | --- | --- |
| Position in NL43 | **2362** | 2366 | | 2372 | | **2439** | | 2645 | 2684 | 2717 | | 2840 | | 3005 | | 3023 | | 3110 | | **3148** | | **3282** | | 3287 | 3339 | **3679** |
|  | **A** | G | | A | | **C** | | A | A | C | | T | | A | | A | | G | | **C** | | **G** | | G | T | **C** |
| Western B (n = 31) | **A22** | G24 | | A19 | | **C20** | | A30 | G22 | C29 | | C15 | | A28 | | A27 | | G30 | | **C30** | | **G31** | | G30 | T31 | **C23** |
|  | **G4** | A3 | | G6 | | **A3** | |  | A8 | T1 | | T12 | | G2 | | G3 | | A1 | | **T1** | |  | | A1 |  | **A8** |
|  | **C1** |  | |  | | **T1** | |  |  |  | | A2 | |  | |  | |  | |  | |  | |  |  |  |
|  |  |  | |  | |  | |  |  |  | | G1 | |  | |  | |  | |  | |  | |  |  |  |
| KSB (n = 96) | **G81** | A94 | | G90 | | **A74** | | G93 | A96 | T93 | | A95 | | G90 | | G87 | | A94 | | **T76** | | **A80** | | A93 | C90 | **T73** |
|  | **A15** | G2 | | A6 | | **G18** | | A3 |  | C3 | | T1 | | A6 | | A9 | | G2 | | **C16** | | **G12** | | G3 | T3 | **C19** |
|  |  |  | |  | | **C4** | |  |  |  | |  | |  | |  | |  | | **G4** | | **C4** | |  |  | **A3** |
|  |  |  | |  | |  | |  |  |  | |  | |  | |  | |  | |  | |  | |  |  | **G1** |
| KSAA* | **N37S** |  | |  | | **P63T** | |  |  |  | |  | |  | |  | |  | | **T299I** | | **V345 M** | |  |  | **T377I** |
| **31 Korean signature nucleotides and 11 Korean signature amino acids residues** | | | | | | | | | | | | | | | | | | | | | | | | | | |
| Position in NL43 | 3776 | | 3839 | | 3896 | | **3951** | | 2959 | | 4016 | | 4106 | | **4268** | | **4320** | | 4415 | | **4530** | | **4600** | 4859 | 4866 | **4950** |
|  | C | | G | | A | | **C** | | G | | G | | T | | **G** | | **G** | | G | | **C** | | **C** | T | T | **C** |
| Western B (n = 31) | C31 | | G24 | | G23 | | **T18** | | T22 | | A19 | | T30 | | **G17** | | **G26** | | A23 | | **A19** | | **C31** | T30 | T25 | **C25** |
|  |  | | A7 | | A7 | | **C7** | | G5 | | G11 | | C1 | | **A10** | | **A4** | | G8 | | **C10** | |  | C1 | C6 | **T2** |
|  |  | |  | | T1 | | **A6** | | A4 | | T1 | |  | | **T2** | |  | |  | |  | |  |  |  |  |
|  |  | |  | |  | |  | |  | |  | |  | | **C1** | |  | |  | |  | |  |  |  |  |
| KSB (n = 96) | T95 | | A92 | | A93 | | **C81** | | G91 | | G82 | | C95 | | **A95** | | **A89** | | G94 | | **C76** | | **A93** | C93 | C96 | **T74** |
|  | C1 | | G4 | | G2 | | **T14** | | A5 | | A14 | | T1 | | **G1** | | **G7** | | A2 | | **A19** | | **C3** | T2 |  | **C20** |
|  |  | |  | | C1 | | **A1** | |  | |  | |  | |  | |  | |  | | **T1** | |  | A1 |  |  |
| KSAAa |  | |  | |  | | **S468P** | |  | |  | |  | | **R672K** | | **V690I** | |  | | **I760L** | | **T783N** |  |  | **A900V** |

In total, 31 residues were found to be Korean signature nucleotide residues based on the criteria (>75%) applied in a previous study [2]. All 11 Korean signatures amino acids were derived from minor amino acids from Western subtype B. This finding provides evidence for a founder effect because KSB was derived from its parent, Western subtype B [5,6]. Position in NL43* denotes from the initial codon of protease coding protein. In total, 11 Korean signature amino acids (KSAA)a originated from nonsynonymous changes from Western subtype B.
