# Supplementary material for: Sequence Length of HIV-1 Subtype B Increases Over Time: Analysis of a Cohort of Patients With Hemophilia Over 30 Years
Source: Preprints.org preprint supplement (doi:10.20944/preprints202104.0217.v1), 2021-04-07
Supplement: Supplementary file 7 [file Table S3.docx]

**Table 3.** Comparison of the frequency of the signature pattern nucleotides in 62 KSB-infected patients.

| Gene | *gag* | *pol* | | | *vif* | | *vpr,tat,rev,vpu* | | *env* | | *nef* | |
| --- | --- | --- | --- | --- | --- | --- | --- | --- | --- | --- | --- | --- |
| Nucleotide position | 2190a | 2321 | 4235 | 5070a | 5253 | None | | 6469 | | None | |
| Signature | G | G |  | A |  |  | |  | |  | |
| Cluster O (n = 9) | 1.0 | 1.0 |  | 1.0 |  |  | |  | |  | |
| Other KSB (n = 53) | 0.0 | 0.0 |  | 0.0 |  |  | |  | |  | |
| Signature |  |  | G |  | A |  | | G | |  | |
| Cluster P (n = 13) |  |  | 1.0 |  | 1.0 |  | | 1.0 | |  | |
| Other KSB (n = 49) |  |  | 0.0 |  | 0 |  | | 0.0 | |  | |

N = the number of patients infected with KSB, including 20 hemophiliacs and local controls. Positions 2190a and 5070a overlap with *pol* and *vif* gene, respectively. Nucleotide positions in the second row indicate the position of the nucleotides in the third and sixth rows in HIV-1 NL4-3. 1 and 0.0 denote 100% and 0% of all sequences within cluster O and other KSB, respectively [2-7].
