# Supplementary figures and images for: Sequence Length of HIV-1 Subtype B Increases Over Time: Analysis of a Cohort of Patients With Hemophilia Over 30 Years
Source: Preprints.org preprint supplement (doi:10.20944/preprints202104.0217.v1), 2021-04-07

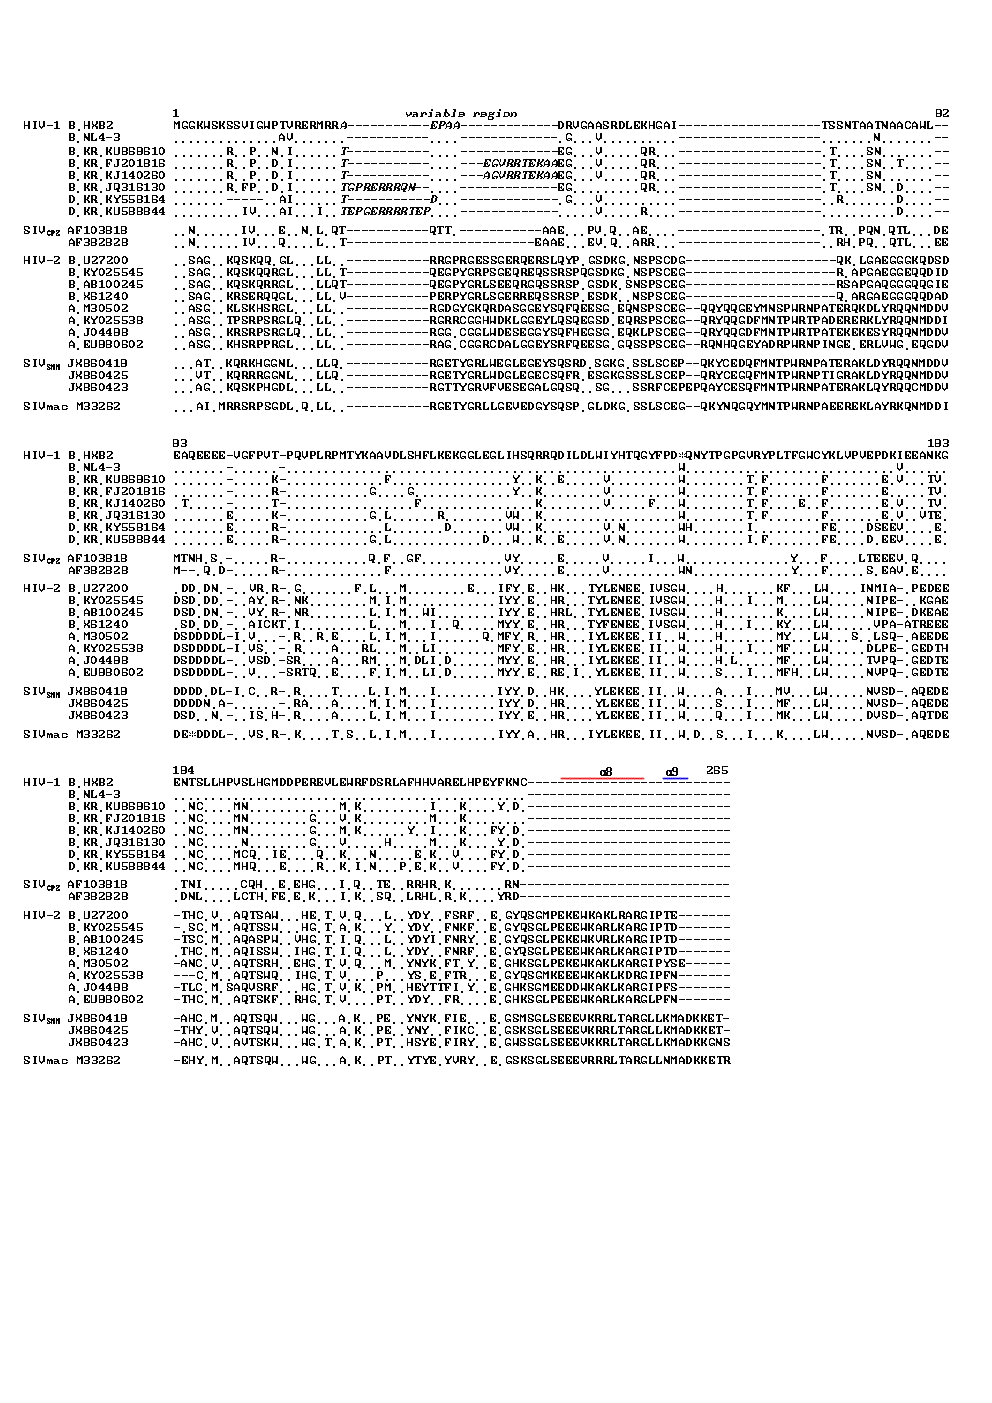


Figure. S3

Supplement: Supplementary file 1 [file supplementary]

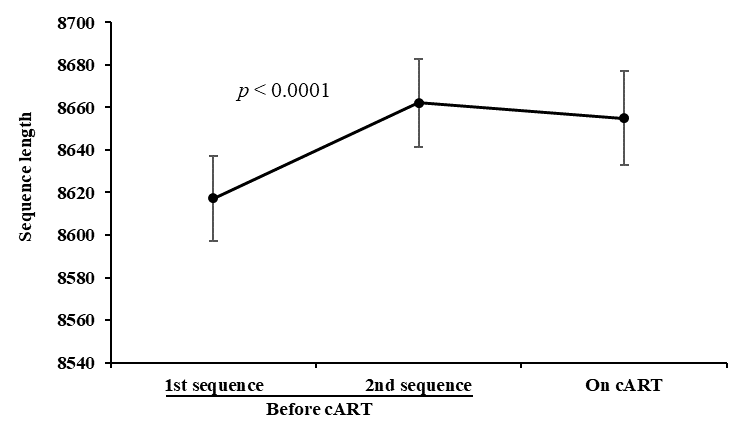


Figure S1

Supplement: Supplementary file 2 [file Figure S1.docx]

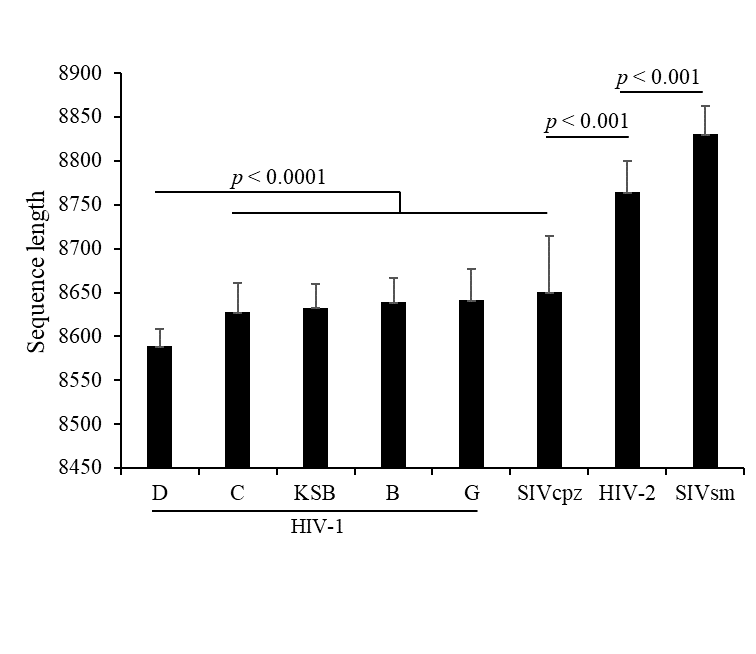


**Figure S2**

Supplement: Supplementary file 3 [file Figure S2 210326.docx]
